# Supplementary material for: The Mechanism of Mori Folium and Eucommiae Cortex against Cyclophosphamide-Induced Immunosuppression Integrating Network Pharmacology, Molecular Docking, Molecular Dynamics Simulations, and Experimental Validation
Source: MDPI journal article supplement (doi:10.3390/metabo13111151), 2023-11-15
Supplement: s1 [file s1]

## 1 Supplementary Figures and Tables

**Figure S1.** The structures of other poses in molecular docking. The binding site of molecular docking: docking results of AR(A) and AKT1(D) with iristectorigenin A; docking results of MMP2(B), JUN(E) MAPK14(G) and PTSG2(H) with arachidonic acid; docking results of TNF(C) with icosa-11,14,17-trienoic acid methyl ester; docking results of CASP3 (F) with quercetin.

## 1.2 Supplementary tables

Table S1. Detailed information on active compounds.

| ID  | MOL ID    | Name                            | OB    | DL   | Inchi Key                               | Herb      |
|-----|-----------|---------------------------------|-------|------|-----------------------------------------|-----------|
| A1  | MOL002773 | beta-carotene                   | 37.18 | 0.58 | OENHQHLEO<br>ONYIE-<br>JLTXGRSLSA<br>-N | MF,<br>EC |
| A2  | MOL000098 | quercetin                       | 46.43 | 0.28 | REFJWTPED<br>VJJIY-<br>UHFFFAOYS<br>A-N | MF,<br>EC |
| A3  | MOL000358 | beta-sitosterol                 | 36.91 | 0.75 | KZJWDPNRJ<br>ALLNS-<br>VJSFXXLFSA<br>-N | MF,<br>EC |
| A4  | MOL000422 | kaempferol                      | 41.88 | 0.24 | IYRMWMYZS<br>QPJKC-<br>UHFFFAOYS<br>A-N | MF,<br>EC |
| EC1 | MOL009030 | Dehydrodieugenol                | 30.1  | 0.24 | KETPSFSOGF<br>KJJY-<br>UHFFFAOYS<br>A-N | EC        |
| EC2 | MOL009015 | (-)-Tabernemontanine            | 58.67 | 0.61 | FFVRRQMGG<br>GTQRH-<br>MSPRAJMNS<br>A-N | EC        |
| EC3 | MOL009031 | (9R)- 6'- methoxycinchonan-9-ol | 68.22 | 0.4  | LOUPRKONT<br>ZGTKE-<br>AFHBHXEDS<br>A-N | EC        |
| EC4 | MOL000073 | ent-Epicatechin                 | 48.96 | 0.24 | PFTAWBLQP<br>ZVEMU-<br>ZFWWWQNU<br>SA-N | EC        |
| EC5 | MOL011604 | Syringetin                      | 36.82 | 0.37 | UZMAPBJVX<br>OGOFT-<br>UHFFFAOYS<br>A-N | EC        |
| EC6 | MOL000211 | Mairin                          | 55.38 | 0.78 | QGJZLNKBHJ<br>ESQX-<br>FZFNOLFKSA<br>-N | EC        |
| EC7 | MOL009055 | hirsutin_qt                     | 49.81 | 0.37 | UIZYKATWA<br>LCYCD-<br>UHFFFAOYS<br>A-N | EC        |
| EC8 | MOL009057 | liriodendrin_qt                 | 53.14 | 0.8  | KJHRHHLEZJ<br>FLDH-<br>OZCSAQGGS<br>A-N | EC        |
| EC9 | MOL000443 | Erythraline                     | 49.18 | 0.55 | TVOFUERNM<br>ZTYRM-                     | EC        |

|      |           |                                                                                                           |       |      |                                                             |    |
|------|-----------|-----------------------------------------------------------------------------------------------------------|-------|------|-------------------------------------------------------------|----|
| EC10 | MOL002058 | Medioresinol                                                                                              | 57.2  | 0.62 | KBXCAEBGS<br>A-N<br>VJOBNGRIBL<br>NUKN-<br>BMHXQBND<br>SA-N | EC |
| EC11 | MOL009053 | 4-[(2S,3R)-5-[(E)-3-hydroxyprop-1-enyl]-7-methoxy-3-methylol-2,3-dihydrobenzofuran-2-yl]-2-methoxy-phenol | 50.76 | 0.39 | KUSXBOZNR<br>PQEON-<br>LNFBDUAVS<br>A-N                     | EC |
| EC12 | MOL004367 | olivil                                                                                                    | 62.23 | 0.41 | BVHIKUCXN<br>BQDEM-<br>XMCHAPAW<br>SA-N                     | EC |
| EC13 | MOL005922 | Acanthoside B                                                                                             | 43.35 | 0.77 | WEKCEGQSII<br>QPAQ-<br>IRBNZIFYSA-<br>N                     | EC |
| EC14 | MOL006709 | 8-Hydroxypinoresinol                                                                                      | 92.43 | 0.55 | CICMVLOHB<br>ZPXIT-<br>WNISUXOKS<br>A-N                     | EC |
| EC15 | MOL007059 | 3-beta-Hydroxymethyllenetanshiquinone                                                                     | 32.16 | 0.41 | RUJKJFRMC<br>YQMLH-<br>ZDUSSCGKS<br>A-N                     | EC |
| EC16 | MOL007563 | Yangambin                                                                                                 | 57.53 | 0.81 | HRLFUIXSXU<br>ASEX-<br>RZTYQLBFS<br>A-N                     | EC |
| EC17 | MOL008240 | (E)-3-[4-[(1R,2R)-2-hydroxy-2-(4-hydroxy-3-methoxy-phenyl)-1-methylol-ethoxy]-3-methoxy-phenyl]acrolein   | 56.32 | 0.36 | LWLOALZBD<br>OVWAE-<br>FMEUAVTJS<br>A-N                     | EC |
| EC18 | MOL009007 | Eucommin A                                                                                                | 30.51 | 0.85 | GLGVEKKQP<br>FRBAS-<br>UOVCOODAS<br>A-N                     | EC |
| EC19 | MOL009009 | (+)-medioresinol                                                                                          | 87.19 | 0.62 | VJOBNGRIBL<br>NUKN-<br>HANNOOJCS<br>A-N                     | EC |
| EC20 | MOL009038 | GBGB                                                                                                      | 45.58 | 0.83 | FYZYXYLPB<br>WLLGI-<br>AUOPOVQUS<br>A-N                     | EC |
| EC21 | MOL009027 | Cyclopamine                                                                                               | 55.42 | 0.82 | QASFUMOKH<br>FSJGL-<br>LAFRSMQTS<br>A-N                     | EC |
| EC22 | MOL009029 | Dehydrodiconiferyl alcohol 4,gamma'-di-O-beta-D-glucopyranoside_qt                                        | 51.44 | 0.4  | GQNBCFQSS<br>DOEHP-<br>LNFBDUAVS<br>A-N                     | EC |
| EC23 | MOL009042 | Helenalin                                                                                                 | 77.01 | 0.19 | ZVLOPMNVF<br>LSSAA-                                         | EC |

|      |           |                                              |       |      |                                                                                                                                                                                                                                                                                                                                                                                                                                                                                                                                                                                                                    |    |
|------|-----------|----------------------------------------------|-------|------|--------------------------------------------------------------------------------------------------------------------------------------------------------------------------------------------------------------------------------------------------------------------------------------------------------------------------------------------------------------------------------------------------------------------------------------------------------------------------------------------------------------------------------------------------------------------------------------------------------------------|----|
| EC24 | MOL009047 | (+)-Eudesmin                                 | 33.29 | 0.62 | XEPQRQSN<br>A-N<br>PEUUVVGQI<br>VMSAW-<br>RZTYQLBFS<br>A-N<br>CLXVBVLQK<br>LQNRQ-<br>UHFFFAOYS<br>A-N<br>CCRPIWFQM<br>LICC-<br>UHFFFAOYS<br>A-N<br>XQAVRBUXE<br>PJVR-<br>JSIPCRQOSA-<br>N<br>YZXBAPSDX<br>ZZRGB-<br>DOFZRALJSA<br>-N<br>OVBPIULPVI<br>DEAO-<br>LBPRGKRZS<br>A-N<br>HCXVJBMSM<br>IARIN-<br>PHZDYDNGS<br>A-N<br>UFHGABBBZ<br>RPRJV-<br>UHFFFAOYS<br>A-N<br>YYGNTYWP<br>HWGJRM-<br>AAJYLUCBS<br>A-N<br>KZJWDPNRJ<br>ALLNS-<br>FBZNIEFRSA-<br>N<br>SGTCGCCQZ<br>OUMJJ-<br>YMILTQATS<br>A-N<br>MJJWBIFYR<br>AYKU-<br>FJPSCYHJSA-<br>N<br>YRHQANFINI<br>ANSK-<br>UHFFFAOYS<br>A-N<br>GQNLRMVM<br>ODTKOO- | EC |
| MF1  | MOL007879 | Tetramethoxyluteolin                         | 43.68 | 0.37 |                                                                                                                                                                                                                                                                                                                                                                                                                                                                                                                                                                                                                    | MF |
| MF2  | MOL003759 | Iristectorigenin A                           | 63.36 | 0.34 |                                                                                                                                                                                                                                                                                                                                                                                                                                                                                                                                                                                                                    | MF |
| MF3  | MOL003975 | icosa-11,14,17-trienoic acid<br>methyl ester | 44.81 | 0.23 |                                                                                                                                                                                                                                                                                                                                                                                                                                                                                                                                                                                                                    | MF |
| MF4  | MOL001439 | arachidonic acid                             | 45.57 | 0.2  |                                                                                                                                                                                                                                                                                                                                                                                                                                                                                                                                                                                                                    | MF |
| MF5  | MOL000433 | FA                                           | 68.96 | 0.71 |                                                                                                                                                                                                                                                                                                                                                                                                                                                                                                                                                                                                                    | MF |
| MF6  | MOL000449 | Stigmasterol                                 | 43.83 | 0.76 |                                                                                                                                                                                                                                                                                                                                                                                                                                                                                                                                                                                                                    | MF |
| MF7  | MOL000729 | Oxysanguinarine                              | 46.97 | 0.87 |                                                                                                                                                                                                                                                                                                                                                                                                                                                                                                                                                                                                                    | MF |
| MF8  | MOL001506 | Supraene                                     | 33.55 | 0.42 |                                                                                                                                                                                                                                                                                                                                                                                                                                                                                                                                                                                                                    | MF |
| MF9  | MOL001771 | poriferast-5-en-3beta-ol                     | 36.91 | 0.75 |                                                                                                                                                                                                                                                                                                                                                                                                                                                                                                                                                                                                                    | MF |
| MF10 | MOL002218 | scopolin                                     | 56.45 | 0.39 |                                                                                                                                                                                                                                                                                                                                                                                                                                                                                                                                                                                                                    | MF |
| MF11 | MOL003842 | Albanol                                      | 83.16 | 0.24 |                                                                                                                                                                                                                                                                                                                                                                                                                                                                                                                                                                                                                    | MF |
| MF12 | MOL003847 | Inophyllum E                                 | 38.81 | 0.85 |                                                                                                                                                                                                                                                                                                                                                                                                                                                                                                                                                                                                                    | MF |
| MF13 | MOL003850 | 26-Hydroxy-dammara-20,24-<br>dien-3-one      | 44.41 | 0.79 |                                                                                                                                                                                                                                                                                                                                                                                                                                                                                                                                                                                                                    | MF |

|      |           |                            |       |      |                                                             |    |
|------|-----------|----------------------------|-------|------|-------------------------------------------------------------|----|
| MF14 | MOL003851 | Isoramanone                | 39.97 | 0.51 | YUICVKHOS<br>A-N<br>NWFNMRFBJ<br>UONKD-<br>YJQDOJAJSA<br>-N | MF |
| MF15 | MOL003856 | Moracin B                  | 55.85 | 0.23 | GOUSNRMG<br>QRTROZ-<br>UHFFFAOYS<br>A-N                     | MF |
| MF16 | MOL003857 | Moracin C                  | 82.13 | 0.29 | ZTGHWUWB<br>QNCCOH-<br>UHFFFAOYS<br>A-N                     | MF |
| MF17 | MOL003858 | Moracin D                  | 60.93 | 0.38 | CHAAQDMH<br>LLQJRO-<br>UHFFFAOYS<br>A-N                     | MF |
| MF18 | MOL003859 | Moracin E                  | 56.08 | 0.38 | GDSYWTBPY<br>YYLLE-<br>UHFFFAOYS<br>A-N                     | MF |
| MF19 | MOL003860 | Moracin F                  | 53.81 | 0.23 | MQRQKQBO<br>YQLFAI-<br>UHFFFAOYS<br>A-N                     | MF |
| MF20 | MOL003861 | Moracin G                  | 75.78 | 0.42 | PRQYZCKJW<br>CQXNM-<br>UHFFFAOYS<br>A-N                     | MF |
| MF21 | MOL003862 | Moracin H                  | 74.35 | 0.51 | QRLJHLHVD<br>MQXPO-<br>UHFFFAOYS<br>A-N                     | MF |
| MF22 | MOL003879 | 4-Prenylresveratrol        | 40.54 | 0.21 | WWFOQQIW<br>OKJBSJ-<br>PLNGDYQAS<br>A-N                     | MF |
| MF23 | MOL006630 | Norartocarpetin            | 54.93 | 0.24 | ZSYPIPFQOQ<br>GYHH-<br>UHFFFAOYS<br>A-N                     | MF |
| MF24 | MOL007179 | Linolenic acid ethyl ester | 46.1  | 0.2  | JYYFMIOPGO<br>FNPK-<br>AGRJPVHOS<br>A-N                     | MF |
| MF25 | MOL013083 | Skimmin (8CI)              | 38.35 | 0.32 | VPAOSFFTK<br>WUGAD-<br>TVKJYDDYS<br>A-N                     | MF |

**Table S2.** 204 common targets (Table S3) between MFEC targets and disease-related targets.

| Target                                        | Gene symbol | Compound |
|-----------------------------------------------|-------------|----------|
| ATP-binding cassette sub-family A member<br>1 | ABCA1       | MF4      |

|                                                          |         |                                                                      |
|----------------------------------------------------------|---------|----------------------------------------------------------------------|
| ATP-binding cassette sub-family G member 2               | ABCG2   | A2                                                                   |
| Tyrosine-protein kinase ABL                              | ABL1    | EC1                                                                  |
| Adenosine A2a receptor                                   | ADORA2A | EC1, EC20, MF3                                                       |
| Beta-2 adrenergic receptor                               | ADRB2   | A2, A3, EC2, EC3, EC6, EC15, EC24, MF6, MF22                         |
| Aryl hydrocarbon receptor                                | AHR     | A2, A4                                                               |
| RAC-alpha serine/threonine-protein kinase                | AKT1    | A1, A2, A4                                                           |
| ALK tyrosine kinase receptor                             | ALK     | EC1                                                                  |
| Arachidonate 5-lipoxygenase                              | ALOX5   | A2, A4, EC1, MF3, MF4                                                |
| Androgen receptor                                        | AR      | A2, A4, EC2, EC5, EC21, MF1, MF2, MF12, MF13, MF15, MF17, MF18, MF23 |
| Apoptosis regulator BAX                                  | BAX     | A2, A3, A4                                                           |
| Apoptosis regulator Bcl-2                                | BCL2    | A1, A2, A3, A4, MF3, MF11                                            |
| Bcl-2-like protein 1                                     | BCL2L1  | A2, MF11                                                             |
| Baculoviral IAP repeat-containing protein 5              | BIRC5   | A2                                                                   |
| Bromodomain-containing protein 4                         | BRD4    | EC1, MF13                                                            |
| Carbonic anhydrase II                                    | CA2     | EC7, EC15, EC20, MF25                                                |
| Caspase-3                                                | CASP3   | A1, A2, A3, A4, MF4, MF5                                             |
| Caspase-7                                                | CASP7   | A1                                                                   |
| Caspase-8                                                | CASP8   | A1, A2, A3                                                           |
| Caspase-9                                                | CASP9   | A1, A2, A3                                                           |
| Calcium sensing receptor                                 | CASR    | MF3                                                                  |
| Caveolin-1                                               | CAV1    | A1, A2                                                               |
| C-C motif chemokine 2                                    | CCL2    | A2                                                                   |
| Cyclin-A2                                                | CCNA2   | EC1, EC5, EC17, EC22, MF2, MF16, MF22                                |
| G2/mitotic-specific cyclin-B1                            | CCNB1   | A2, EC1                                                              |
| G1/S-specific cyclin-D1                                  | CCND1   | A2, MF4                                                              |
| Cyclin T1                                                | CCNT1   | EC1                                                                  |
| CD40 ligand                                              | CD40LG  | A2                                                                   |
| Dual specificity phosphatase Cdc25A                      | CDC25A  | MF13                                                                 |
| Cell division control protein 2 homolog                  | CDK1    | A2, A4, EC1, MF3                                                     |
| Cell division protein kinase 2                           | CDK2    | EC1, EC5, EC17, MF1, MF2, MF17, MF18, MF20, MF22                     |
| Cell division protein kinase 4                           | CDK4    | EC1, MF4                                                             |
| Cell division protein kinase 5                           | CDK5    | EC1                                                                  |
| Cell division protein kinase 9                           | CDK9    | EC1                                                                  |
| Cyclin-dependent kinase inhibitor 1                      | CDKN1A  | A2                                                                   |
| Cyclin-dependent kinase inhibitor 2A, isoforms 1/2/3     | CDKN2A  | A2                                                                   |
| Cholesteryl ester transfer protein                       | CETP    | MF4                                                                  |
| Serine/threonine-protein kinase Chk1                     | CHEK1   | MF1, MF2                                                             |
| Serine/threonine-protein kinase Chk2                     | CHEK2   | A2                                                                   |
| Neuronal acetylcholine receptor protein, alpha-7 chain   | CHRNA7  | A3, EC2, EC3, EC9, EC15, MF6                                         |
| Inhibitor of nuclear factor kappa-B kinase subunit alpha | CHUK    | A2                                                                   |
| Cannabinoid receptor 1                                   | CNR1    | EC1, MF3                                                             |
| Cannabinoid receptor 2                                   | CNR2    | EC1, MF3, MF8                                                        |
| C-reactive protein                                       | CRP     | A2                                                                   |
| Catenin beta-1                                           | CTNNB1  | A1                                                                   |
| Cathepsin D                                              | CTSD    | A2                                                                   |
| Cathepsin G                                              | CTSG    | EC1                                                                  |
| C-X-C motif chemokine 10                                 | CXCL10  | A2                                                                   |

|                                               |          |                                                                                                                                                          |
|-----------------------------------------------|----------|----------------------------------------------------------------------------------------------------------------------------------------------------------|
| C-X-C motif chemokine 11                      | CXCL11   | A2                                                                                                                                                       |
| C-X-C motif chemokine 2                       | CXCL2    | A2                                                                                                                                                       |
| Interleukin-8 receptor B                      | CXCR2    | EC1                                                                                                                                                      |
| Cytochrome P450 17A1                          | CYP17A1  | MF13                                                                                                                                                     |
| Cytochrome P450 19A1                          | CYP19A1  | EC18, MF3, MF11, MF13                                                                                                                                    |
| Cytochrome P450 1A1                           | CYP1A1   | A2, A4                                                                                                                                                   |
| Cytochrome P450 3A4                           | CYP3A4   | A1, A2, A4                                                                                                                                               |
| Dihydrofolate reductase                       | DHFR     | MF5                                                                                                                                                      |
| Dipeptidyl peptidase IV                       | DPP4     | A2, A4, EC5, EC11, EC15, EC17,<br>EC22, MF1, MF2                                                                                                         |
| D(2) dopamine receptor                        | DRD2     | EC2, EC3                                                                                                                                                 |
| Transcription factor E2F1                     | E2F1     | A2                                                                                                                                                       |
| Pro-epidermal growth factor                   | EGF      | A2, MF4                                                                                                                                                  |
| Epidermal growth factor receptor              | EGFR     | A2, EC1, EC3                                                                                                                                             |
| Leukocyte elastase                            | ELANE    | EC1                                                                                                                                                      |
| ETS domain-containing protein Elk-1           | ELK1     | A2                                                                                                                                                       |
| Ephrin receptor                               | EPHB4    | EC1                                                                                                                                                      |
| Receptor tyrosine-protein kinase erbB-2       | ERBB2    | A2, EC1                                                                                                                                                  |
| Receptor tyrosine-protein kinase erbB-3       | ERBB3    | A2                                                                                                                                                       |
| Estrogen receptor                             | ESR1     | EC4, EC5, EC11, EC17, EC22, MF2,<br>MF12, MF15, MF16, MF17, MF18,<br>MF20, MF21, MF22                                                                    |
| Estrogen receptor beta                        | ESR2     | EC5, EC7, MF1, MF2, MF12, MF15,<br>MF17, MF18                                                                                                            |
| Thrombin                                      | F2       | MF11                                                                                                                                                     |
| Tissue factor                                 | F3       | A1, A2                                                                                                                                                   |
| Fibroblast growth factor receptor 1           | FGFR1    | EC1                                                                                                                                                      |
| Vascular endothelial growth factor receptor 1 | FLT1     | EC1                                                                                                                                                      |
| Tyrosine-protein kinase receptor FLT3         | FLT3     | EC1                                                                                                                                                      |
| Proto-oncogene c-Fos                          | FOS      | A2                                                                                                                                                       |
| Glucose-6-phosphate 1-dehydrogenase           | G6PD     | MF4                                                                                                                                                      |
| Gap junction alpha-1 protein                  | GJA1     | A1, A2                                                                                                                                                   |
| Glutamate [NMDA] receptor subunit epsilon 2   | GRIN2B   | MF3                                                                                                                                                      |
| Glycogen synthase kinase-3 beta               | GSK3B    | EC1, EC5, EC7, EC17, MF1, MF2,<br>MF12, MF17, MF18, MF20, MF22                                                                                           |
| Glutathione S-transferase P                   | GSTP1    | A2, A4                                                                                                                                                   |
| Beta-glucuronidase                            | GUSB     | EC1                                                                                                                                                      |
| Histone deacetylase 1                         | HDAC1    | EC1, MF5                                                                                                                                                 |
| Histone deacetylase 3                         | HDAC3    | EC1                                                                                                                                                      |
| Histone deacetylase 6                         | HDAC6    | MF5                                                                                                                                                      |
| Hypoxia-inducible factor 1-alpha              | HIF1A    | A2, EC13, EC18                                                                                                                                           |
| Heme oxygenase 1                              | HMOX1    | A1, A2, A4                                                                                                                                               |
| Heat shock factor protein 1                   | HSF1     | A2                                                                                                                                                       |
| Heat shock protein HSP 90-alpha               | HSP90AA1 | A2, A3, A4, EC2, EC3, EC4, EC5,<br>EC7, EC10, EC11, EC12, EC15, EC17,<br>EC19, EC22, EC24, MF1, MF2, MF15,<br>MF16, MF17, MF18, MF19, MF23,<br>MF25      |
| Heat shock protein HSP 90-beta                | HSP90AB1 | A2, A3, A4, EC1, EC2, EC3, EC4,<br>EC5, EC7, EC10, EC11, EC12, EC15,<br>EC17, EC19, EC22, EC24, MF1, MF2,<br>MF15, MF16, MF17, MF18, MF19,<br>MF23, MF25 |
| Heat shock protein beta-1                     | HSPB1    | A2                                                                                                                                                       |
| Intercellular adhesion molecule 1             | ICAM1    | A2, A4, MF3                                                                                                                                              |

|                                                                |        |                                                           |
|----------------------------------------------------------------|--------|-----------------------------------------------------------|
| Isocitrate dehydrogenase [NADP]<br>cytoplasmic                 | IDH1   | MF3                                                       |
| Interferon gamma                                               | IFNG   | A2                                                        |
| Insulin-like growth factor II                                  | IGF2   | A2                                                        |
| Insulin-like growth factor-binding protein 3                   | IGFBP3 | A2                                                        |
| Ig gamma-1 chain C region                                      | IGHG1  | EC7, EC15, MF6                                            |
| Inhibitor of nuclear factor kappa-B kinase<br>subunit beta     | IKBKB  | A4                                                        |
| Interleukin-10                                                 | IL10   | A2                                                        |
| Interleukin-1 alpha                                            | IL1A   | A2                                                        |
| Interleukin-1 beta                                             | IL1B   | A2                                                        |
| Interleukin-2                                                  | IL2    | A2                                                        |
| Interleukin-6                                                  | IL6    | A2                                                        |
| Insulin receptor                                               | INSR   | A2, A4, EC1                                               |
| Interferon regulatory factor 1                                 | IRF1   | A2                                                        |
| Integrin alpha-L                                               | ITGAL  | MF3                                                       |
| Integrin beta-2                                                | ITGB2  | MF3                                                       |
| Tyrosine-protein kinase JAK2                                   | JAK2   | EC1                                                       |
| Tyrosine-protein kinase JAK3                                   | JAK3   | EC1                                                       |
| Transcription factor AP-1                                      | JUN    | A1, A2, A3, A4                                            |
| Calcium-activated potassium channel<br>subunit alpha 1         | KCNMA1 | EC1, EC16, MF1                                            |
| Lysine-specific histone demethylase 1                          | KDM1A  | EC1                                                       |
| Vascular endothelial growth factor receptor<br>2               | KDR    | EC1, EC7, MF3                                             |
| Tyrosine-protein kinase LCK                                    | LCK    | EC1                                                       |
| Mitogen-activated protein kinase 1                             | MAPK1  | A2, MF4                                                   |
| Mitogen-activated protein kinase 14                            | MAPK14 | EC5, EC7, EC17, MF1, MF2, MF13,<br>MF17, MF18, MF20, MF22 |
| Mitogen-activated protein kinase 8                             | MAPK8  | A4                                                        |
| Induced myeloid leukemia cell<br>differentiation protein Mcl-1 | MCL1   | EC13, EC18, MF3                                           |
| p53-binding protein Mdm-2                                      | MDM2   | EC1                                                       |
| Hepatocyte growth factor receptor                              | MET    | EC1                                                       |
| Neprilysin                                                     | MME    | MF5                                                       |
| Interstitial collagenase                                       | MMP1   | A1, A2, A4, EC1                                           |
| 72 kDa type IV collagenase                                     | MMP2   | A1, A2, EC1                                               |
| Stromelysin-1                                                  | MMP3   | A2                                                        |
| Matrix metalloproteinase-9                                     | MMP9   | A2, EC1                                                   |
| Myeloperoxidase                                                | MPO    | A2                                                        |
| Serine/threonine-protein kinase mTOR                           | MTOR   | EC1, MF11                                                 |
| Myc proto-oncogene protein                                     | MYC    | A1, A2                                                    |
| Neutrophil cytosol factor 1                                    | NCF1   | A2                                                        |
| Nuclear factor erythroid 2-related factor 2                    | NFE2L2 | A2                                                        |
| NF-kappa-B inhibitor alpha                                     | NFKBIA | A2                                                        |
| Nitric oxide synthase, inducible                               | NOS2   | A4, EC5, EC7, MF1, MF2, MF13,<br>MF17, MF18, MF21         |
| Nitric oxide synthase, endothelial                             | NOS3   | A2, MF4                                                   |
| NAD(P)H dehydrogenase [quinone] 1                              | NQO1   | A2, EC1                                                   |
| LXR-alpha                                                      | NR1H3  | MF3, MF13                                                 |
| Nuclear receptor subfamily 1 group I<br>member 2               | NR1I2  | A2, A4                                                    |
| Glucocorticoid receptor                                        | NR3C1  | EC21, MF13                                                |
| Mineralocorticoid receptor                                     | NR3C2  | EC21, MF6, MF14                                           |
| Ornithine decarboxylase                                        | ODC1   | A2                                                        |
| Delta-type opioid receptor                                     | OPRD1  | EC2, EC3, EC9, EC15                                       |

|                                                                                                      |         |                                                                                                                                                                                    |
|------------------------------------------------------------------------------------------------------|---------|------------------------------------------------------------------------------------------------------------------------------------------------------------------------------------|
| Mu-type opioid receptor                                                                              | OPRM1   | A3, EC2, EC3, EC9, EC15                                                                                                                                                            |
| Poly [ADP-ribose] polymerase 1                                                                       | PARP1   | A2, EC1                                                                                                                                                                            |
| Phosphodiesterase 4A                                                                                 | PDE4A   | MF3                                                                                                                                                                                |
| Platelet-derived growth factor receptor beta                                                         | PDGFRB  | EC1                                                                                                                                                                                |
| Platelet endothelial cell adhesion molecule                                                          | PECAM1  | MF4                                                                                                                                                                                |
| Progesterone receptor                                                                                | PGR     | A3, A4, EC6, MF6, MF9, MF14                                                                                                                                                        |
| PI3-kinase p110-alpha subunit                                                                        | PIK3CA  | EC1                                                                                                                                                                                |
| PI3-kinase p110-beta subunit                                                                         | PIK3CB  | EC1                                                                                                                                                                                |
| PI3-kinase p110-delta subunit                                                                        | PIK3CD  | EC1                                                                                                                                                                                |
| PI3-kinase p110-gamma subunit                                                                        | PIK3CG  | A2, A3, A4, EC1, EC2, EC9, MF17                                                                                                                                                    |
| Proto-oncogene serine/threonine-protein kinase Pim-1                                                 | PIM1    | EC1, EC5, EC11, EC17, EC22, MF2, MF12, MF22                                                                                                                                        |
| Cytosolic phospholipase A2                                                                           | PLA2G4A | MF4                                                                                                                                                                                |
| Tissue-type plasminogen activator                                                                    | PLAT    | A2                                                                                                                                                                                 |
| Urokinase-type plasminogen activator                                                                 | PLAU    | A2, MF6, MF11                                                                                                                                                                      |
| Plasminogen                                                                                          | PLG     | MF11                                                                                                                                                                               |
| Peroxisome proliferator-activated receptor alpha                                                     | PPARA   | A2, MF3, MF8                                                                                                                                                                       |
| Peroxisome proliferator-activated receptor delta                                                     | PPARD   | A2, MF3                                                                                                                                                                            |
| Peroxisome proliferator activated receptor gamma                                                     | PPARG   | A2, A4, EC5, EC17, MF1, MF2, MF3, MF4, MF16, MF17, MF18MF22                                                                                                                        |
| Protein kinase C alpha type                                                                          | PRKCA   | A2, A3                                                                                                                                                                             |
| Protein kinase C beta type                                                                           | PRKCB   | A2, MF4, MF13                                                                                                                                                                      |
| Protein kinase C delta                                                                               | PRKCD   | MF13                                                                                                                                                                               |
| Protein kinase C epsilon                                                                             | PRKCE   | MF13                                                                                                                                                                               |
| Protein kinase C theta                                                                               | PRKCQ   | MF13                                                                                                                                                                               |
| Phosphatidylinositol-3,4,5-trisphosphate 3-phosphatase and dual-specificity protein phosphatase PTEN | PTEN    | A2, MF4                                                                                                                                                                            |
| Prostaglandin G/H synthase 1                                                                         | PTGS1   | A2, A3, A4, EC2, EC3, EC4, EC7, EC9, EC10, EC18, MF1, MF2, MF3, MF4, MF6, MF7, MF12, MF22, MF23, MF24                                                                              |
| Prostaglandin G/H synthase 2                                                                         | PTGS2   | A1, A2, A3, A4, EC2, EC3, EC4, EC5, EC7, EC9, EC10, EC11, EC12, EC14, EC15, EC16, EC17, EC19, EC22, EC24, MF1, MF2, MF3, MF4, MF10, MF12, MF17, MF18, MF21, MF22, MF23, MF24, MF25 |
| mRNA of Protein-tyrosine phosphatase, non-receptor type 1                                            | PTPN1   | EC13, MF3, MF10, MF11, MF13, MF25                                                                                                                                                  |
| RAF proto-oncogene serine/threonine-protein kinase                                                   | RAF1    | A2, MF3                                                                                                                                                                            |
| Retinoic acid receptor alpha                                                                         | RARA    | MF3                                                                                                                                                                                |
| Retinoic acid receptor beta                                                                          | RARB    | MF3                                                                                                                                                                                |
| Retinoblastoma-associated protein                                                                    | RB1     | A2                                                                                                                                                                                 |
| Transcription factor p65                                                                             | RELA    | A2, A4, MF4                                                                                                                                                                        |
| Rho-associated protein kinase 1                                                                      | ROCK1   | MF3                                                                                                                                                                                |
| Nuclear receptor ROR-gamma                                                                           | RORC    | MF3                                                                                                                                                                                |
| Runt-related transcription factor 2                                                                  | RUNX2   | A2                                                                                                                                                                                 |
| Retinoic acid receptor RXR-alpha                                                                     | RXRA    | A2, EC3, EC9, EC15, MF1, MF3, MF4, MF6                                                                                                                                             |
| Sodium channel protein type 5 subunit alpha                                                          | SCN5A   | A2, A3, EC2, EC3, EC5, EC7, EC9, EC10, EC16, EC19, EC24, MF1, MF2, MF6, MF21, MF22                                                                                                 |
| E-selectin                                                                                           | SELE    | A2, A4                                                                                                                                                                             |

Supplementary Material

|                                                                   |          |              |
|-------------------------------------------------------------------|----------|--------------|
| P-selectin                                                        | SELP     | MF4          |
| Plasminogen activator inhibitor 1                                 | SERPINE1 | A2           |
| Solute carrier family 2, facilitated glucose transporter member 4 | SLC2A4   | A2, A4       |
| Sodium-dependent serotonin transporter                            | SLC6A4   | A3, EC2, EC3 |
| Antileukoproteinase                                               | SLPI     | A4           |
| Acyl coenzyme A:cholesterol acyltransferase 1                     | SOAT1    | EC13, EC18   |
| Superoxide dismutase [Cu-Zn]                                      | SOD1     | A2           |
| Osteopontin                                                       | SPP1     | A2           |
| Tyrosine-protein kinase SRC                                       | SRC      | MF4          |
| Matriptase                                                        | ST14     | MF11         |
| Signal transducer and activator of transcription 1-alpha          | STAT1    | A2, A4       |
| Tyrosine-protein kinase SYK                                       | SYK      | EC1          |
| Telomerase reverse transcriptase                                  | TERT     | MF3          |
| Transforming growth factor beta-1                                 | TGFB1    | A2, A3       |
| TGF-beta receptor type I                                          | TGFBR1   | EC1          |
| Thrombomodulin                                                    | THBD     | A2           |
| Toll-like receptor (TLR7)                                         | TLR7     | EC1          |
| Tumor necrosis factor                                             | TNF      | A2, A4, MF13 |
| Tumor necrosis factor receptor superfamily member 1A              | TNFRSF1A | MF4          |
| Tumor necrosis factor receptor superfamily member 1B              | TNFRSF1B | MF4          |
| DNA topoisomerase 2-alpha                                         | TOP2A    | A2           |
| Cellular tumor antigen p53                                        | TP53     | A2           |
| Tyrosinase                                                        | TYR      | EC18         |
| Vascular cell adhesion protein 1                                  | VCAM1    | A2, A4       |
| Vascular endothelial growth factor A                              | VEGFA    | A1, A2       |
| Xanthine dehydrogenase/oxidase                                    | XDH      | A2, A4       |

**Table S3.** The information of active ingredients including 2D structure.

| ID  | Name                               | 2D Structure                                                                         | Database |
|-----|------------------------------------|--------------------------------------------------------------------------------------|----------|
| A1  | beta-carotene                      | 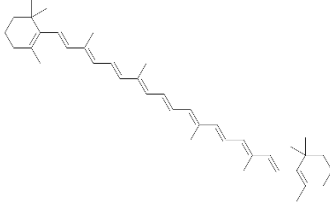   | TCMSP    |
| A2  | quercetin                          |    | TCMSP    |
| A3  | beta-sitosterol                    |    | TCMSP    |
| A4  | kaempferol                         |   | TCMSP    |
| EC1 | Dehydrodieugenol                   |  | TCMSP    |
| EC2 | (A1)-<br>Tabernemontanine          |  | TCMSP    |
| EC3 | (9R)- 6'-<br>methoxycinchonan-9-ol |   | TCMSP    |

# Supplementary Material

MF1

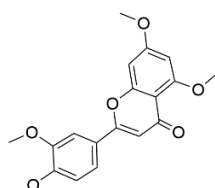

TCMSP

MF2

Tetramethoxyluteolin

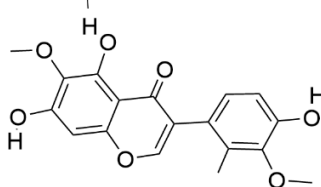

TCMSP

MF3

Iristectorigenin A

icosa-11,14,17-trienoic  
acid methyl ester

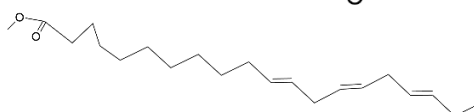

TCMSP

MF4

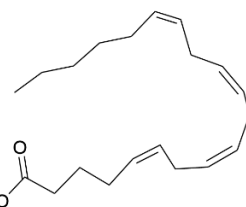

TCMSP

arachidonic acid

**Table S4.** The softwares and databases used in this study.

| Name                  | Version | The url                                                                                                                                                                                                                                  |
|-----------------------|---------|------------------------------------------------------------------------------------------------------------------------------------------------------------------------------------------------------------------------------------------|
| TCMSP                 |         | <a href="https://www.tcmsp-e.com/">https://www.tcmsp-e.com/</a>                                                                                                                                                                          |
| Pubchem               |         | <a href="https://pubchem.ncbi.nlm.nih.gov/">https://pubchem.ncbi.nlm.nih.gov/</a>                                                                                                                                                        |
| SwissTargetPrediction |         | <a href="http://swisstargetprediction.ch/">http://swisstargetprediction.ch/</a>                                                                                                                                                          |
| GeneCards             |         | <a href="https://www.genecards.org/">https://www.genecards.org/</a>                                                                                                                                                                      |
| Cytoscape             | 3.8.1   |                                                                                                                                                                                                                                          |
| UniProt               |         | <a href="https://www.uniprot.org/">https://www.uniprot.org/</a>                                                                                                                                                                          |
| Venny                 | 2.1     | <a href="https://bioinfogp.cnb.csic.es/tools/venny/">https://bioinfogp.cnb.csic.es/tools/venny/</a>                                                                                                                                      |
| String                | 11.5    | <a href="https://www.string-db.org/cgi/input?sessionId=bSwSO9xSIj50&amp;input_page_active_form=multiple_identifiers">https://www.string-<br/>db.org/cgi/input?sessionId=bSwSO9xSIj50&amp;input_page_active_form=multiple_identifiers</a> |
| Metascape             |         | <a href="https://metascape.org/gp/index.html#/main/step1">https://metascape.org/gp/index.html#/main/step1</a>                                                                                                                            |
| Chem 3D               | 19.0    |                                                                                                                                                                                                                                          |
| RCSB PDB              |         | <a href="https://www.rcsb.org/">https://www.rcsb.org/</a>                                                                                                                                                                                |
| Sybyl-X               | 2.1.1   |                                                                                                                                                                                                                                          |

**Table S5.** KEGG pathway analysis of MFEC to treat immune suppression.

| Term ID  | Description                                          | P Value     | Enrichment  | Count |
|----------|------------------------------------------------------|-------------|-------------|-------|
| hsa05200 | Pathways in cancer                                   | 5.22711E-37 | 19.63257421 | 82    |
| ko04933  | AGE-RAGE signaling pathway in diabetic complications | 5.89259E-24 | 51.5409487  | 37    |
| ko05418  | Fluid shear stress and atherosclerosis               | 2.43812E-23 | 38.84700359 | 40    |
| hsa04933 | AGE-RAGE signaling pathway in diabetic complications | 2.68872E-23 | 47.68741983 | 37    |
| hsa05418 | Fluid shear stress and atherosclerosis               | 5.55178E-23 | 37.27212507 | 40    |
| hsa05161 | Hepatitis B                                          | 5.89127E-23 | 32.72366235 | 42    |
| hsa05215 | Prostate cancer                                      | 7.5885E-23  | 48.67301038 | 36    |
| hsa05167 | kaposi sarcoma-associated herpesvirus infection      | 1.04074E-20 | 28.43440469 | 40    |
| ko05215  | Prostate cancer                                      | 1.14496E-20 | 50.72436331 | 32    |
| hsa05166 | Human T-cell leukemia virus 1 infection              | 1.53341E-20 | 21.03664008 | 45    |
| hsa04151 | PI3K-Akt signaling pathway                           | 3.87349E-20 | 17.41981424 | 48    |
| hsa05163 | human cytomegalovirus infection                      | 1.17483E-19 | 23.55908905 | 41    |
| hsa05160 | Hepatitis C                                          | 1.21346E-19 | 30.19262675 | 37    |
| ko04151  | PI3K-Akt signaling pathway                           | 1.26524E-18 | 17.74240339 | 44    |
| ko05166  | HTLV-I infection                                     | 1.78412E-18 | 21.5479473  | 40    |
| hsa04668 | TNF signaling pathway                                | 6.65578E-18 | 37.17489344 | 31    |
| hsa05205 | Proteoglycans in cancer                              | 9.97559E-18 | 23.40621065 | 37    |
| hsa05212 | Pancreatic cancer                                    | 1.08881E-17 | 47.09014825 | 28    |
| ko05205  | Proteoglycans in cancer                              | 1.40921E-17 | 24.45638945 | 36    |
| ko04668  | TNF signaling pathway                                | 1.53644E-17 | 38.30746187 | 30    |
